# Supplementary material
Source: PubMed Central journal article supplement (PMC9378504)

## Supporting Information

### Discovery of a First-in-Class Degradable for Nuclear Receptor Binding SET Domain Protein 2 (NSD2) and Ikaros/Aiolos

Fanye Meng<sup>1#</sup>, Chenxi Xu<sup>2,3#</sup>, Kwang-Su Park<sup>1</sup>, H. Ümit Kaniskan<sup>1\*</sup>, Gang Greg Wang<sup>2,3,4\*</sup> and Jian Jin<sup>1\*</sup>

<sup>1</sup>Mount Sinai Center for Therapeutics Discovery, Departments of Pharmacological Sciences and Oncological Sciences, Tisch Cancer Institute, Icahn School of Medicine at Mount Sinai, New York, NY 10029, USA

<sup>2</sup>Lineberger Comprehensive Cancer Center, University of North Carolina at Chapel Hill, Chapel Hill, NC 27599, USA

<sup>3</sup>Department of Biochemistry and Biophysics, University of North Carolina at Chapel Hill, Chapel Hill, NC 27599, USA

<sup>4</sup>Department of Pharmacology, University of North Carolina at Chapel Hill, Chapel Hill, NC 27599, USA

\* email: [husnu.kaniskan@mssm.edu](mailto:husnu.kaniskan@mssm.edu); email: [greg\\_wang@med.unc.edu](mailto:greg_wang@med.unc.edu);

email: [jian.jin@mssm.edu](mailto:jian.jin@mssm.edu)

## Table of Contents

### Supplemental Figures

|                                                                                                               |   |
|---------------------------------------------------------------------------------------------------------------|---|
| Figure S1. Western blotting (WB) analysis of compound <b>1</b> in 293FT, KMS11 and H929 cells.....            | 3 |
| Figure S2. WB analysis of NSD2 after shRNA-mediated knockdown (KD) of NSD2.....                               | 3 |
| <b><sup>1</sup>H and <sup>13</sup>C NMR &amp; HPLC and Mass Spectra</b>                                       |   |
| <sup>1</sup> H and <sup>13</sup> C NMR spectra of Compound <b>9</b> in DMSO <i>d</i> <sub>6</sub> .....       | 4 |
| HPLC spectrum and Mass spectrum of Compound <b>9</b> .....                                                    | 5 |
| <sup>1</sup> H NMR and <sup>13</sup> C NMR spectra of Compound <b>17</b> in DMSO- <i>d</i> <sub>6</sub> ..... | 6 |
| HPLC spectrum and Mass spectrum of Compound <b>17</b> .....                                                   | 7 |
| <sup>1</sup> H NMR and <sup>13</sup> C NMR spectra of Compound <b>18</b> in DMSO- <i>d</i> <sub>6</sub> ..... | 8 |
| HPLC spectrum and Mass spectrum of Compound <b>18</b> .....                                                   | 9 |

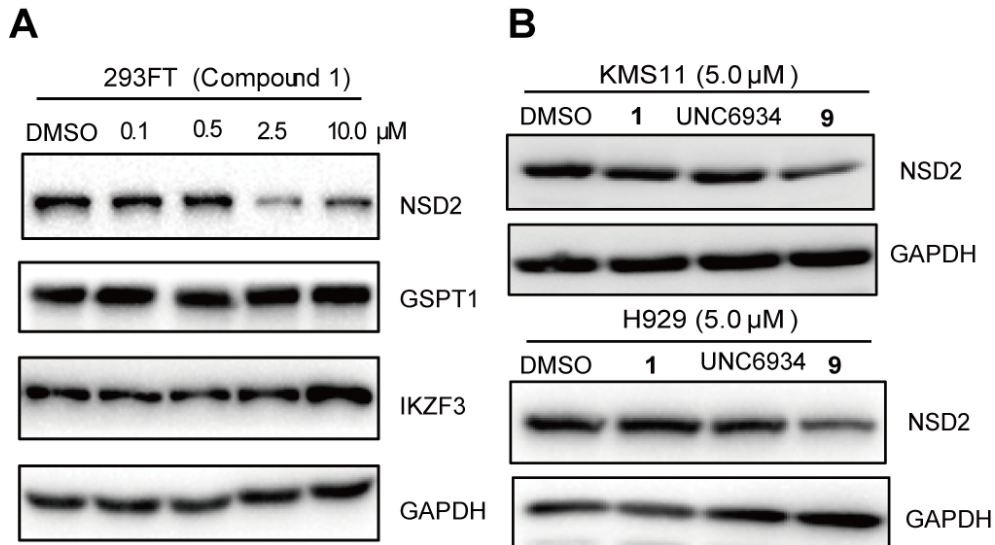

**Figure S1.** (A) Compound **1** induces degradation of NSD2, but not GSPT1 and IKZF3, in 293FT cells. 293FT cells were treated with compound **1** at the indicated concentration for 48 h. Cell lysates were collected and the protein levels of NSD2, GSPT1 and IKZF3 were determined by western blotting with GAPDH as the loading control. WB results are representative of three independent experiments. (B) Compound **1** does not induce NSD2 degradation in KMS11 and H929 cells. KMS11 and H929 cells were treated with DMSO or the indicated compound at 5  $\mu$ M for 72 h. Cell lysates were collected and the protein level of NSD2 was determined by western blotting with GAPDH as the loading control. WB results are representative of three independent experiments.

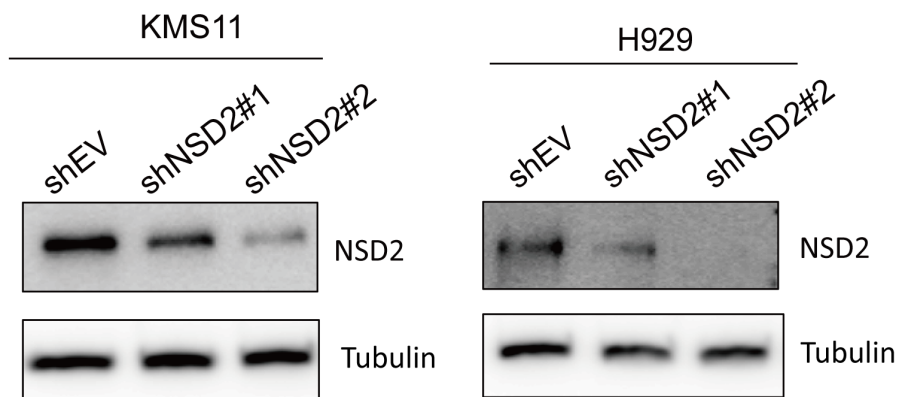

**Figure S2.** Immunoblots for NSD2 and Tubulin after shRNA-mediated knockdown (KD) of NSD2 (sh#1 or sh#2), relative to transduction of empty vector (shEV), in KMS11 (left) and H929 (right) cells. The NSD2 protein level was detected by western blotting with tubulin as the loading control.

# $^1\text{H}$ NMR and $^{13}\text{C}$ NMR spectra of Compound 9 in $\text{DMSO}-d_6$

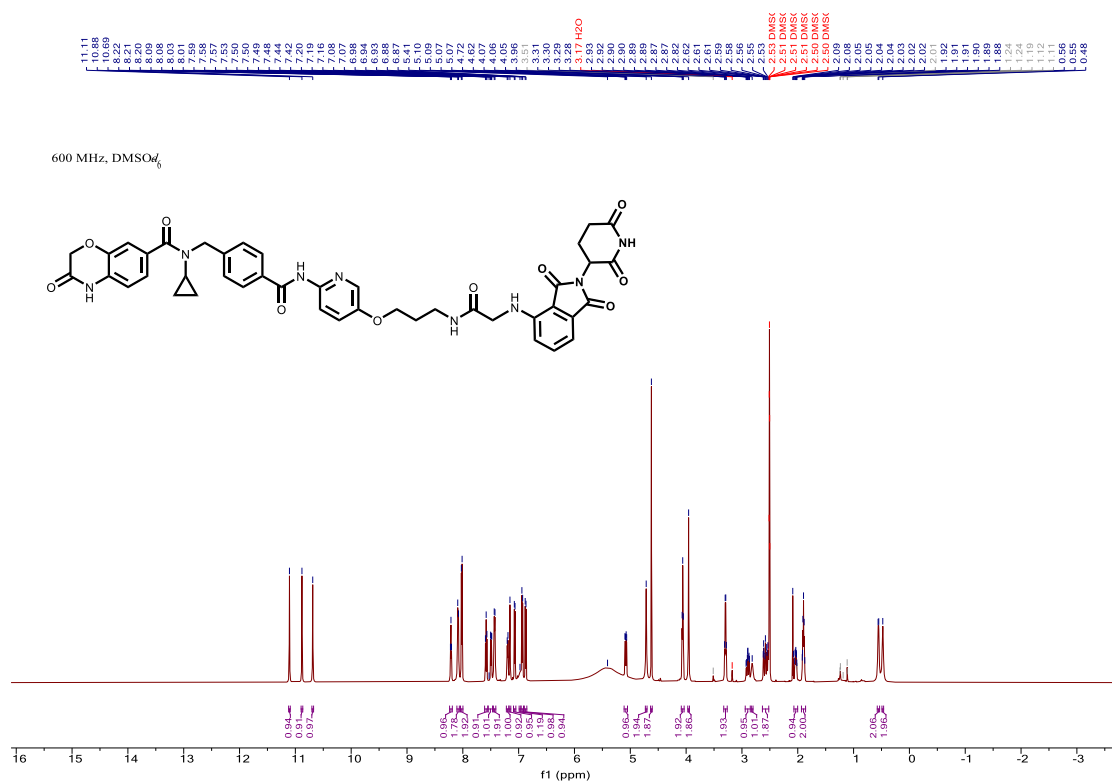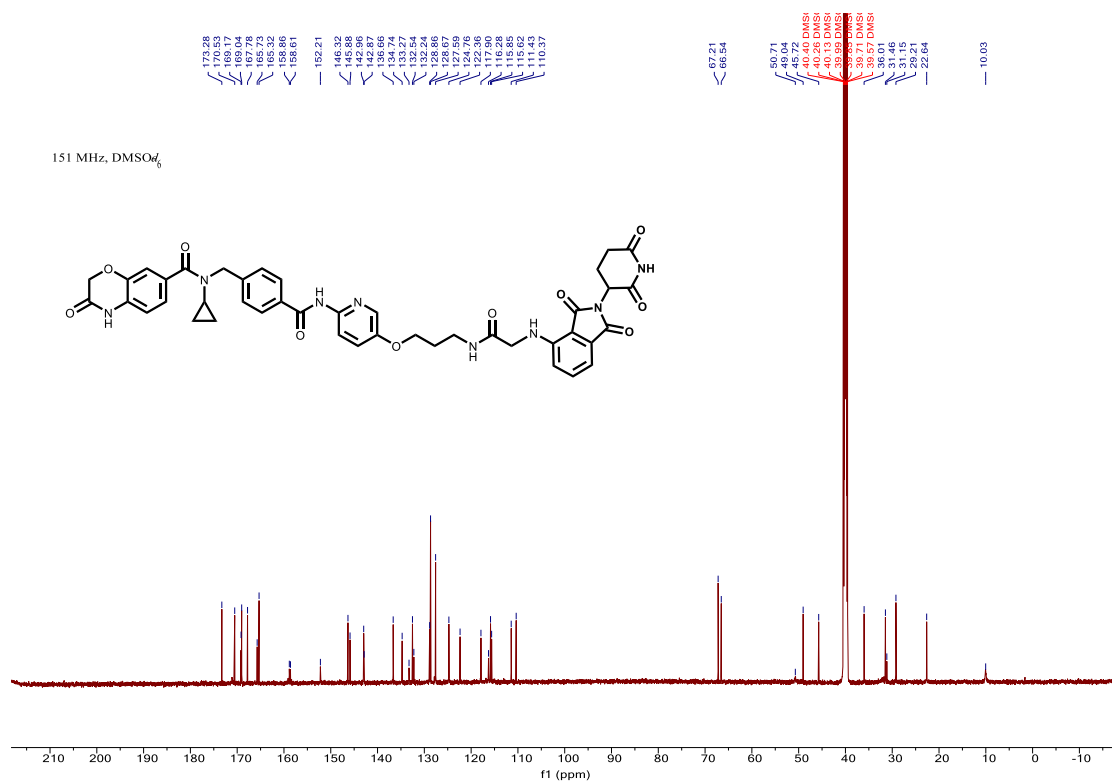

## HPLC spectrum of Compound 9

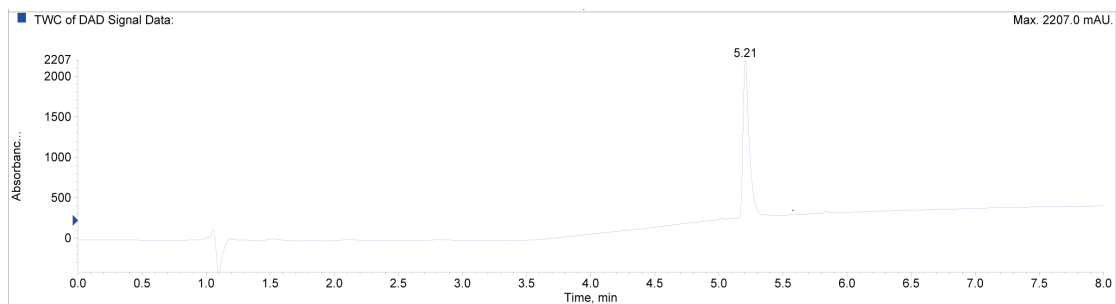

## Mass spectrum of Compound 9

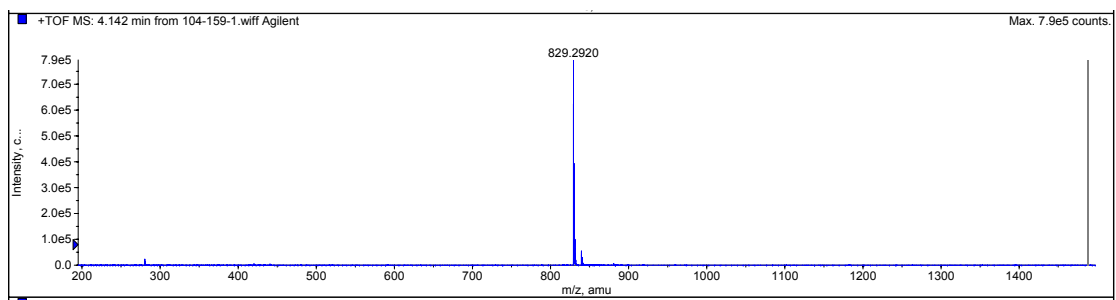



## HPLC spectrum of Compound 17

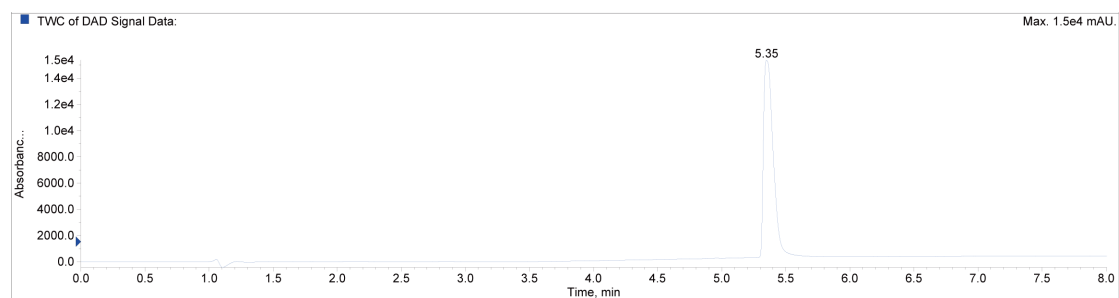

## Mass spectrum of Compound 17

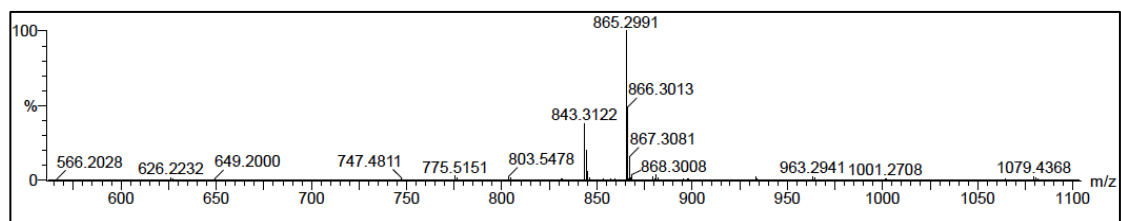

# $^1\text{H}$ NMR and $^{13}\text{C}$ NMR spectra of Compound 18 in $\text{DMSO-}d_6$

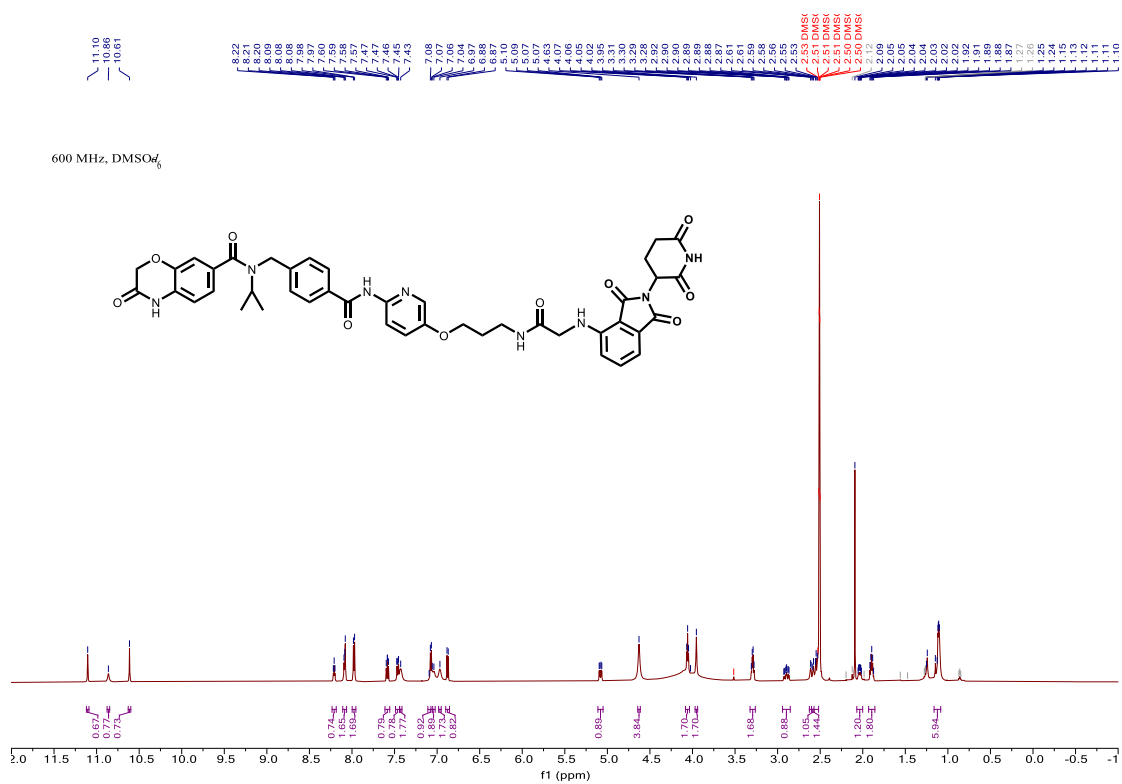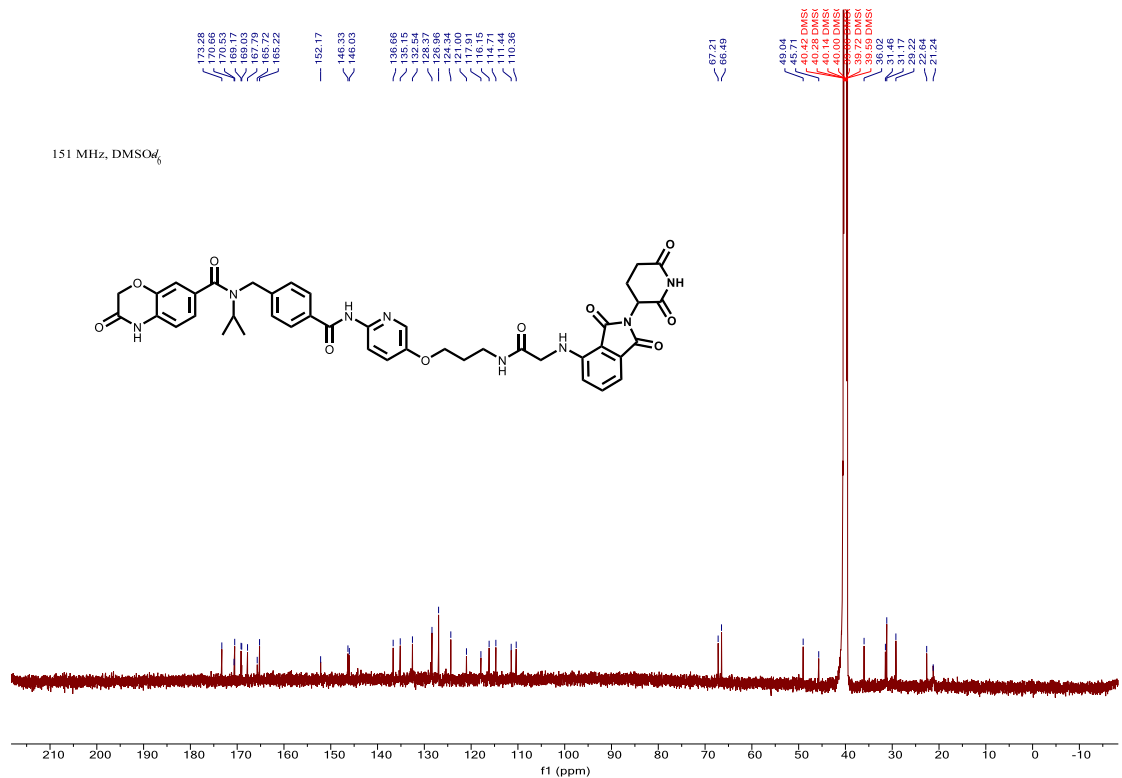



## HPLC spectrum of Compound 18

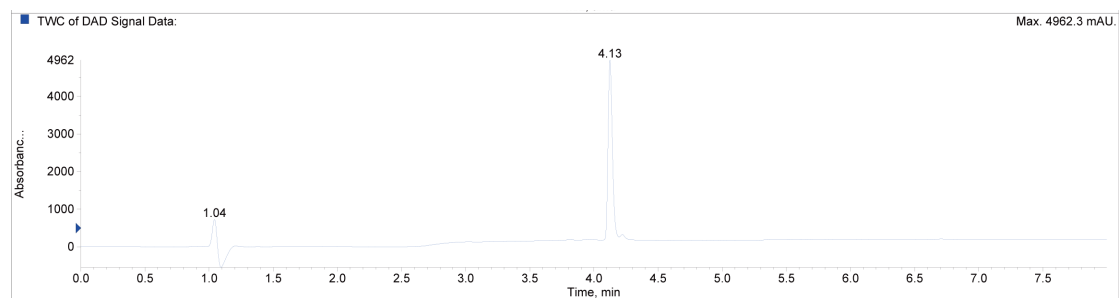

## Mass spectrum of Compound 18

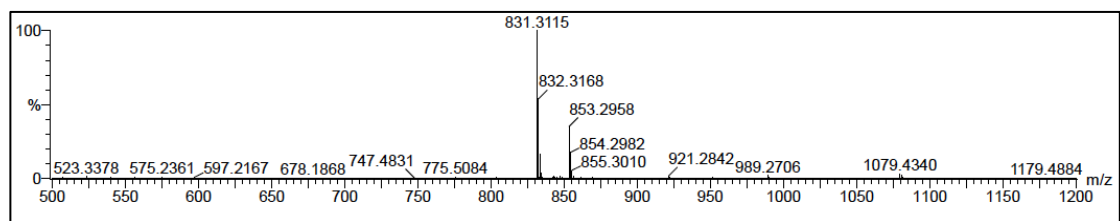

Supplement: NIHMS1827506-supplement-SupplemantalInfo1.pdf [file NIHMS1827506-supplement-SupplemantalInfo1.pdf]
